# Supplementary material for: Strength and failure behavior of a graphene sheet containing bi-grain-boundaries
Source: Royal Society of Chemistry journal article supplement (doi:10.1039/c4ra10126j), 2014-10-16

Supporting Information for

## **Strength and failure behavior of a graphene containing bi-grain-boundary**

**Baocheng Yang<sup>a#</sup>, Shuaiwei Wang<sup>a#</sup>, Yanzhen Guo<sup>a</sup>, Jinyun Yuan<sup>a</sup>, Yubing Si<sup>a</sup>,**

**Shouren Zhang<sup>a</sup>, Houyang Chen<sup>b\*</sup>**

*<sup>a</sup> Institute of Nanostructured Functional Materials, Huanghe Science and*

*Technology College, Zhengzhou, Henan 450006, China*

*<sup>b</sup> Department of Chemical and Biological Engineering, State University of New*

*York at Buffalo, Buffalo, New York 14260-4200, USA*

---

\* To whom correspondence should be addressed. Email: [hchen23@buffalo.edu](mailto:hchen23@buffalo.edu)

# These authors contributed equally to this work.

Fig. S1 The failure processes of ZZ1 ( $T5.5^\circ, \perp 5.5^\circ$ ) at  $T = 1$  K (a-e) and 1200 K (f-j).

Fig. S1 (a-j) is a part of graphene containing bi-GBs which is amplified from the black box. The formation of new structures are highlighted by green.

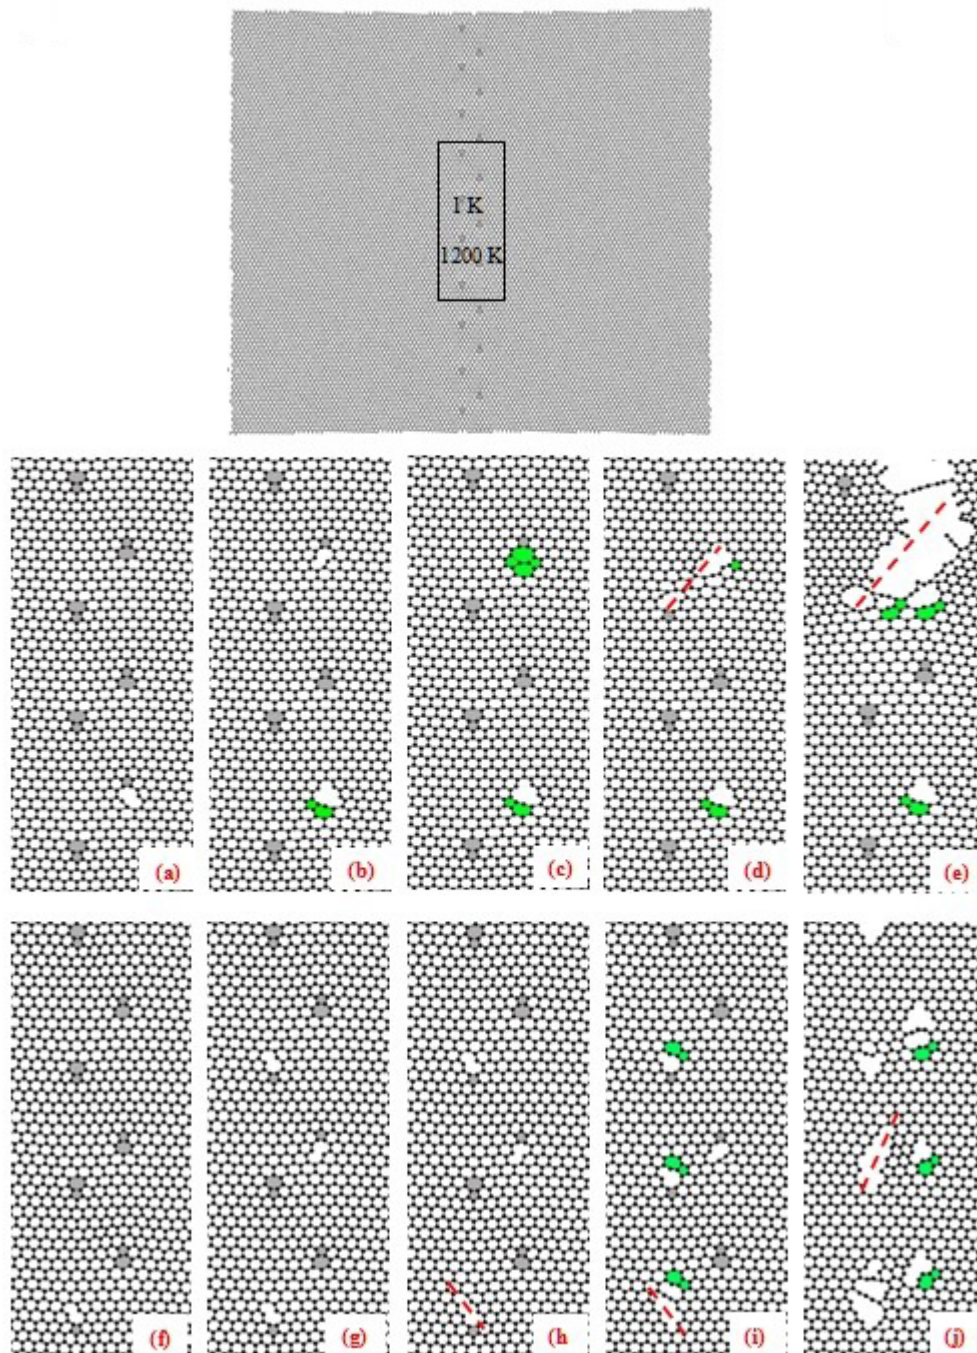

Supplement: c4ra10126j1.pdf [file c4ra10126j1.pdf]
